# Supplementary material for: A Radiometrically Dated Record of Antarctic Ice Sheet Response to Millennial-Scale Climate Cycles during Glacials and Interglacials
Source: Research Square preprint supplement (doi:10.21203/rs.3.rs-1300507/v1), 2022-02-11
Supplement: Supplementary file 1 [file 0d22329454fab58add476141.xlsx]

## Sheet: Sheet1
Sample Identifier	87Sr/86Sr	STD err% (1 sigma)
Opal
MA113_Op2	0.715707	0.00103074
MA113_Op4	0.7168	0.00107206
MA113_Op5	0.715473	0.000700565
MA113_Op7	0.715617	0.00070432
PRR 50489-OpA	0.711476	0.000680411
PRR 50489-OpB	0.713651	0.00065835
PRR 50489-OpBC	0.711478	0.000643167
PRR 50489-OpC	0.713131	0.00134553
PRR 50489-OpD	0.71189	0.000647854
PRR 50489-OpF	0.712675	0.00174208
Calcite
MA113c_0B	0.71543	0.000842712
MA113 C_0C	0.71536	0.000979733
MA113 C_0C	0.715318	0.000977163
MA113 C_0D	0.715331	0.00103188
MA113 C_0F	0.715351	0.00062799
MA113 C_1A	0.715341	0.000761399
MA113 C_1C	0.715327	0.000735092
MA113c_5B	0.715295	0.000721392
MA113c_7A	0.715438	0.000609985
MA113c_7B	0.715475	0.000670296
MA113c_8A	0.715474	0.000650511
G1_PRR50489_6	0.711455	0.000608092
G1_PRR50489_7	0.711205	0.000668571
G1_PRR5089_16	0.712743	0.000614459
G1_PRR5089_17	0.711813	0.000668341
G2_PRR5089_8	0.708979	0.00060677
G2_PRR5089_10	0.710091	0.000820511
G2_PRR5089_11	0.713071	0.00283166
G2_PRR5089_12	0.710715	0.000713108
G2_PRR5089_13	0.712814	0.00144401
G2_PRR5089_14	0.711122	0.000584932
G3_PRR5089_1	0.711455	0.000718958
G3_PRR5089_2	0.711205	0.000668571
G3_PRR5089_5	0.712593	0.000709883
G3_PRR5089_6	0.711813	0.000572434
G3_PRR5089_8	0.711383	0.000668341
G3_PRR5089_9	0.712983	0.000639823
