# Supplementary material for: A Radiometrically Dated Record of Antarctic Ice Sheet Response to Millennial-Scale Climate Cycles during Glacials and Interglacials
Source: Research Square preprint supplement (doi:10.21203/rs.3.rs-1300507/v1), 2022-02-11
Supplement: Supplementary file 2 [file dad081fc2274833af496ec06.xlsx]

## Sheet: Sheet1
			UC Santa Cruz Stable Isotope Laboratory
			Thermo Fisher Scientific Kiel IV-MAT 253 Results
			Measured 03Nov2019 to 16Jan2021
Sample identifier	δ13C (‰ VPDB)	δ18O (‰ VPDB)	Yield µmol CO2	Equivalent µg CaCO3	Initial mV44	δ18O (‰ SMOW, WATER @ 273.15 K)
MA113_ 0A	-18.27	-57.59	0.79	79	17461.5	-60.55
MA113_ 0B	-17.63	-57.4	0.75	75	17034.3	-60.3606
MA113_ 1B	-18	-56.79	0.67	67	12941.6	-59.7525
MA113_ 2A	-17.98	-57.8	0.75	75	16944.1	-60.7593
MA113_ 2B	-17.81	-58.47	0.85	85	18194.6	-61.4272
MA113_ 3	-17.7066	-57.6144	0.82	82	17943.8	-60.5743
MA113_ 4A	-17.92	-57.62	0.42	42	6317.06	-60.5799
MA113_ 4B	-18.2	-58.24	0.9	90	23062	-61.1979
MA113_ 4C	-18.19	-58.17	0.74	74	14122.7	-61.1281
MA113_ 4D	-18.13	-57.97	0.7	70	12883.8	-60.9288
MA113_ 4E	-18.06	-57.89	0.65	65	11599.2	-60.849
MA113_ 5	-17.38	-56.98	0.66	66	12052.7	-59.9419
G1_PRR5089_6	-22.99	-50.39	0.81	81	17758.9	-53.3726
G1_PRR5089_7	-22.79	-49.02	1.26	126	49045.2	-52.0069
G1_PRR5089_8	-22.91	-48.94	1.28	128	49055	-51.9271
G1_PRR5089_9	-23	-48.79	1.17	117	49051.1	-51.7776
G1_PRR5089_10	-23.14	-48.3	1.28	128	49050.8	-51.2891
G1_PRR5089_13	-23.09	-51.91	1.16	116	49057.5	-54.8878
G1_PRR5089_14	-22.95	-51.74	1.07	107	45604.6	-54.7183
G1_PRR5089_16	-23.18	-49.16	1.26	126	49053.6	-52.1464
G1_PRR5089_17	-23.26	-50.82	1.24	124	49049	-53.8012
G2_PRR5089_2	-22.75	-49.15	0.54	54	9589.89	-52.1365
G2_PRR5089_3	-22.53	-48.81	0.95	95	29666	-51.7975
G2_PRR5089_4	-22.82	-48.97	0.96	96	29158.2	-51.957
G2_PRR5089_5	-22.55	-47.91	0.53	53	9092.66	-50.9004
G2_PRR5089_6	-22.74	-47.88	1.27	127	49085.1	-50.8705
G2_PRR5089_7	-22.57	-47.98	1.02	102	36038.9	-50.9701
G2_PRR5089_8	-22.78	-49.07	0.51	51	8285.44	-52.0567
G2_PRR5089_9	-22.6	-50.84	0.36	36	5277.91	-53.8212
G2_PRR5089_10	-22.65	-51.35	0.34	34	4791.62	-54.3296
G2_PRR5089_12	-22.92	-50.05	0.85	85	21596	-53.0336
G2_PRR5089_13	-22.9	-50.69	0.87	87	22231.5	-53.6716
G2_PRR5089_14	-22.84	-49.1	0.38	38	5469	-52.0866
G2_PRR5089_11	-22.97	-48.8	0.57	57	10472.1	-51.7876
G2_PRR5089_1	-22.33	-49.18	0.63	63	10820.5	-52.1664
G2_PRR5089_8	-22.23	-46.97	0.64	64	10722.3	-49.9633
G2_PRR5089_11b	-21.87	-46.97	0.47	47	7076.69	-49.9633
G3_PRR5089_1	-22.95	-49.66	0.62	62	7364.74	-52.6449
G3_PRR5089_2	-22.72	-48.94	0.59	59	6887.42	-51.9271
G3_PRR5089_3	-22.95	-51.59	0.61	61	7211.44	-54.5688
G3_PRR5089_4	-23.22	-49.98	0.45	45	5102.6	-52.9639
G3_PRR5089_5	-23.22	-49.28	0.63	63	7519.63	-52.2661
G3_PRR5089_6	-23.31	-50.83	0.75	75	9191.88	-53.8112
G3_PRR5089_7	-23.05	-48.98	0.57	57	6615.02	-51.967
G3_PRR5089_8	-23.02	-49.35	0.7	70	8422.67	-52.3358
G3_PRR5089_9	-23.31	-51.56	0.69	69	8332.13	-54.5389
G3_PRR5089_10	-23.18	-49.78	1.11	111	15746.1	-52.7645
G4_PRR5089_1	-22.89	-49.22	1.07	107	14905.7	-52.2062
G4_PRR5089_2	-23.11	-49.64	0.92	92	11936.6	-52.6249
G4_PRR5089_3	-23.23	-50.59	0.71	71	8667.77	-53.5719
G4_PRR5089_4	-23.3	-50.74	0.96	96	12725.1	-53.7215
G4_PRR5089_5	-23.4	-51.3	1.05	105	14414.7	-54.2797
G4_PRR5089_6	-23.39	-51.33	0.84	84	10618.6	-54.3096
